# Supplementary material for: Construction and property investigation of transition-metal complexes modified octamolybdate hybrid materials based on V-shaped organic ligands
Source: Royal Society of Chemistry journal article supplement (doi:10.1039/b911881k), 2009-09-16
Supplement: b911881k.pdf [file b911881k.pdf]

## Electronic Supplementary Information

### Construction and property investigation of transition-metal-complexes modified octamolybdate hybrid materials based on V-shaped organic ligands

Hong-Ying Zang, Ya-Qian Lan, Guang-Sheng Yang, Xin-Long Wang, Kui-Zhan Shao,  
Guang-Juan Xu and Zhong-Min Su\*

Institute of Functional Material Chemistry; Key Lab of Polyoxometalate Science of  
Ministry of Education, Faculty of Chemistry, Northeast Normal University,  
Changchun, 130024, Jilin, People's Republic of China.

\*Corresponding author.

zmsu@nenu.edu.cn; Tel: +86 431 85099108

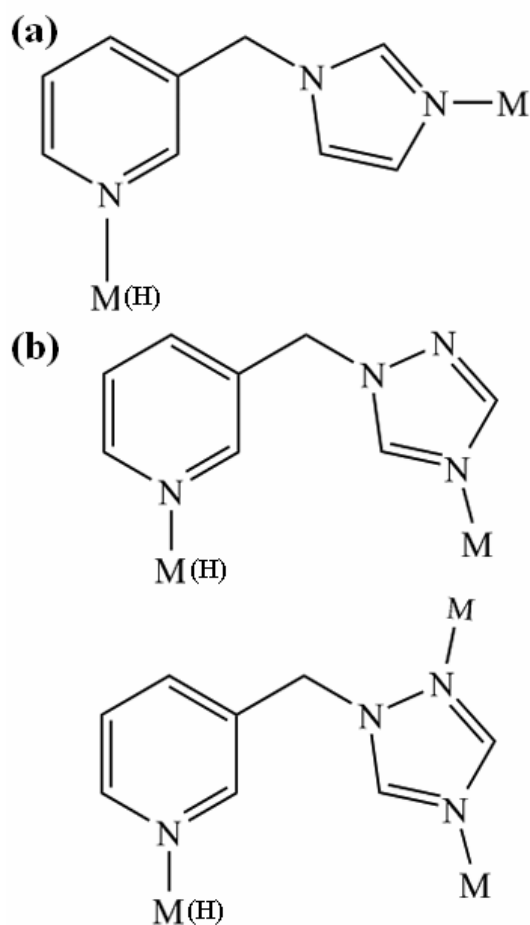

Scheme S1. Coordination numbers and Modes of  $L^1$ ,  $L^2$

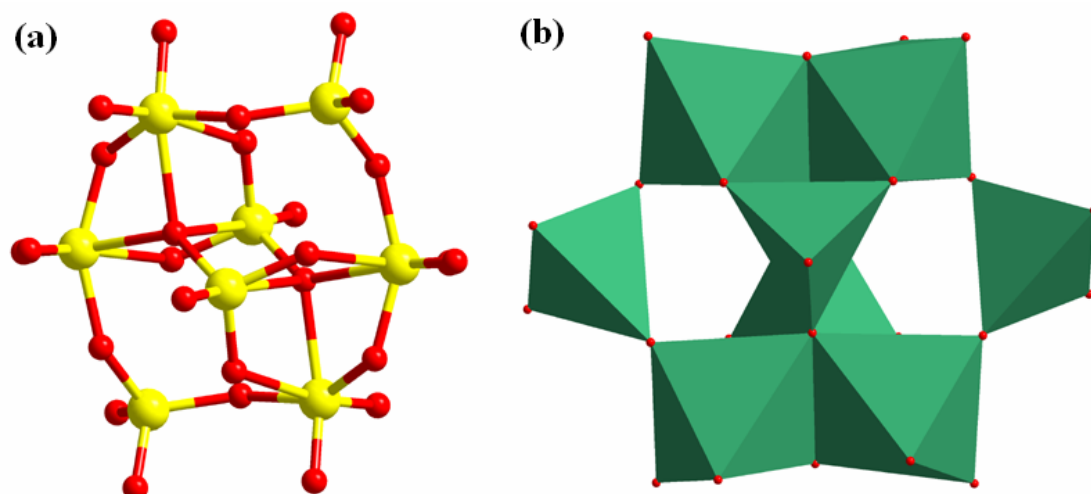

**Fig. S1** (a) Ball-and-stick representation and (b) polyhedra representation of  $\theta$ -isomer of octamolybdate.

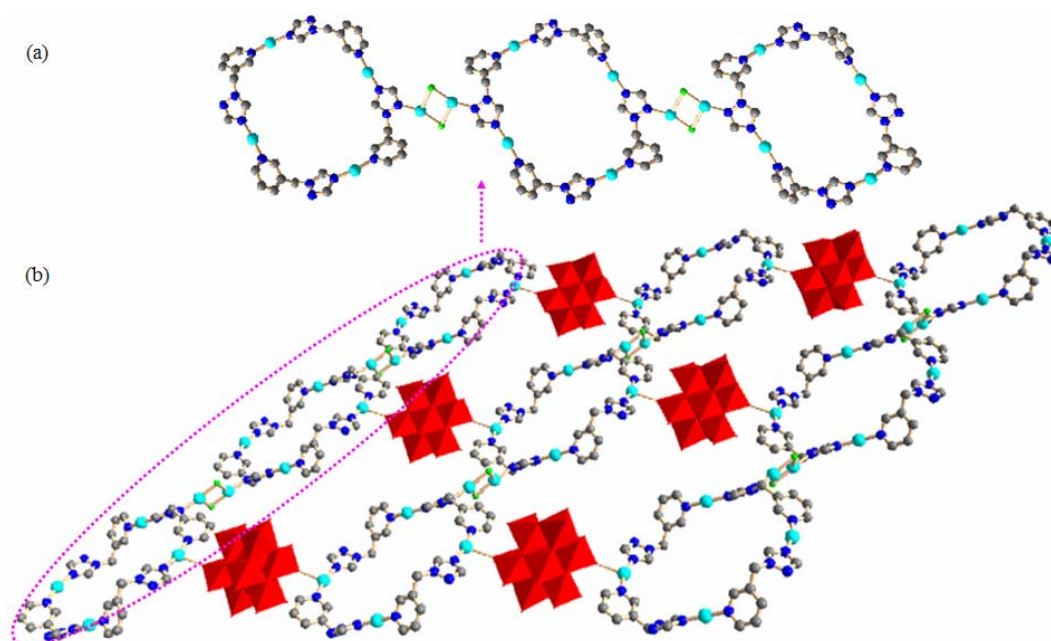

**Fig. S2.** (a) View of 1D metal-organic chain:  $\text{Cu}_2\text{Cl}_2$  bridges the adjacent closed loop into an infinite chain. (b) Every adjacent chains are linked by  $[\text{Mo}_8\text{O}_{26}]^{4-}$  anions into a 2D network in compound **5**.

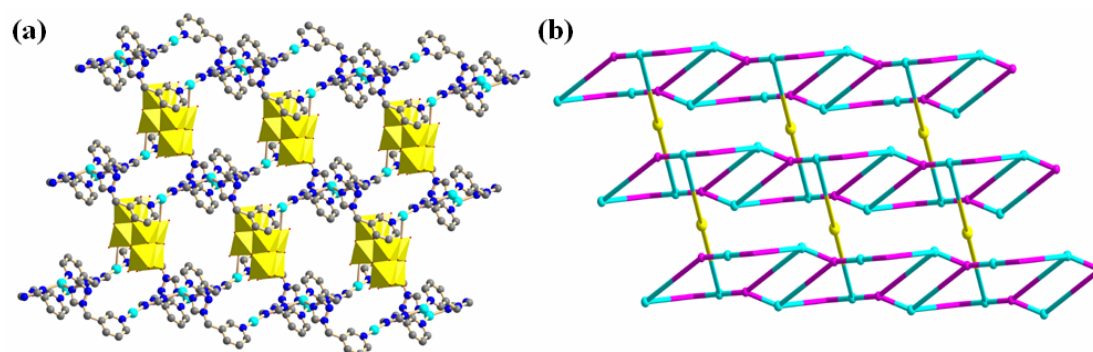

**Fig. S3.** (a) View of the 2D network of compound **6**. (b) Topological representation of the 3-connected 2D network.<sup>16</sup>

**Table S1.** Hydrogen-Bonding Geometry for **3** (in Å and deg)

| D-H...A              | d(D-H)    | d(D...A) | <(DHA) |
|----------------------|-----------|----------|--------|
| N(4)-H(1N)...O(1W)   | 0.857(10) | 2.754(5) | 145(5) |
| O(1W)-H(1B)...N(2)#5 | 0.850(10) | 2.968(5) | 148(3) |
| O(1W)-H(1A)...O(9)#6 | 0.849(10) | 2.819(4) | 150(4) |

Symmetry codes: #1 -x+1, -y, -z+1; #3 x, y-1, z-1; #4 x-1, y+1, z; #5 x, y+1, z; #6 x-1/2, -y+1/2, z+1/2.

**Table S2.** Selected Bond Lengths (Å) and Angles (deg) for compound **1**

| Compound 1         |          |                     |          |
|--------------------|----------|---------------------|----------|
| Cu(1)-N(3)         | 1.971(7) | Cu(1)-O(1W)         | 2.108(7) |
| Cu(1)-O(13)        | 2.231(5) |                     |          |
| N(3)-Cu(1)-O(1W)#1 | 91.2(3)  | N(3)-Cu(1)-O(13)#1  | 89.4(3)  |
| N(3)-Cu(1)-O(13)   | 90.6(2)  | O(1W)-Cu(1)-O(13)#1 | 96.1(2)  |
| N(3)-Cu(1)-O(1W)   | 88.8(3)  | O(1W)-Cu(1)-O(13)   | 83.9(2)  |

Symmetry codes: #1 -x+1, -y+2, -z+2.

**Table S3.** Selected Bond Lengths (Å) and Angles (deg) for compound **2**

| Compound 2      |          |                     |          |
|-----------------|----------|---------------------|----------|
| Cu(1)-N(3)      | 1.982(5) | Cu(1)-N(4)#1        | 2.041(5) |
| Cu(1)-N(6)      | 2.002(5) | Cu(1)-O(6)          | 2.430(4) |
| Cu(1)-N(1)#1    | 2.019(5) | Cu(1)-O(10)#4       | 2.474(4) |
| N(3)-Cu(1)-N(6) | 93.1(2)  | N(1)#1-Cu(1)-N(4)#1 | 88.8(2)  |

|                    |           |                    |           |
|--------------------|-----------|--------------------|-----------|
| N(3)-Cu(1)-N(1)#1  | 178.2(2)  | N(3)-Cu(1)-O(6)    | 89.98(17) |
| N(6)-Cu(1)-N(1)#1  | 88.7(2)   | N(6)-Cu(1)-O(6)    | 95.47(18) |
| N(3)-Cu(1)-N(4)#1  | 89.5(2)   | N(1)#1-Cu(1)-O(6)  | 89.41(18) |
| N(6)-Cu(1)-N(4)#1  | 174.7(2)  | N(4)#1-Cu(1)-O(6)  | 89.14(17) |
| N(6)-Cu(1)-O(10)#4 | 87.643(2) | N(3)-Cu(1)-O(10)#4 | 89.530(2) |

Symmetry codes: #1  $-x+3/2, y-1/2, -z+3/2$ ; #4  $x+1/2, -y+1/2, z+1/2$ .

**Table S4.** Selected Bond Lengths (Å) and Angles (deg) for compound **3**

| <b>Compound 3</b>    |           |                     |           |
|----------------------|-----------|---------------------|-----------|
| Cu(1)-N(3)           | 1.972(3)  | Cu(1)-O(13)         | 1.983(2)  |
| Cu(1)-O(7)#1         | 2.374(2)  |                     |           |
| N(3)-Cu(1)-O(13)#2   | 89.03(11) | N(3)-Cu(1)-O(13)    | 90.97(11) |
| N(3)-Cu(1)-O(7)#1    | 87.73(11) | N(3)#2-Cu(1)-O(7)#1 | 92.27(11) |
| O(13)#2-Cu(1)-O(7)#1 | 96.03(9)  | O(13)-Cu(1)-O(7)#1  | 83.97(9)  |

Symmetry codes: #1  $-x+1/2, -y+1/2, -z$ ; #2  $-x, -y, -z$ .

**Table S5.** Selected Bond Lengths (Å) and Angles (deg) for compound **4**

| <b>Compound 4</b> |            |                  |           |
|-------------------|------------|------------------|-----------|
| Cu(1)-N(1)        | 1.994(3)   | Cu(1)-N(8)       | 2.019(3)  |
| Cu(1)-N(5)        | 2.003(3)   | Cu(1)-O(12)      | 2.437(3)  |
| Cu(1)-N(4)        | 2.014(3)   |                  |           |
| N(1)-Cu(1)-N(5)   | 90.17(14)  | N(4)-Cu(1)-N(8)  | 88.12(14) |
| N(1)-Cu(1)-N(4)   | 179.50(15) | N(1)-Cu(1)-O(12) | 84.61(12) |
| N(5)-Cu(1)-N(4)   | 89.45(14)  | N(5)-Cu(1)-O(12) | 91.23(12) |
| N(1)-Cu(1)-N(8)   | 92.27(14)  | N(4)-Cu(1)-O(12) | 95.08(12) |
| N(5)-Cu(1)-N(8)   | 177.06(14) | N(8)-Cu(1)-O(12) | 90.63(12) |

**Table S6.** Selected Bond Lengths (Å) and Angles (deg) for compound **5**

| <b>Compound 5</b> |           |                 |          |
|-------------------|-----------|-----------------|----------|
| Cu(1)-N(5)        | 1.873(10) | Cu(2)-Cl(1)#2   | 2.559(6) |
| Cu(1)-N(4)#1      | 1.870(10) | Cu(3)-N(1)      | 1.878(9) |
| Cu(2)-N(6)        | 1.987(10) | Cu(3)-N(8)      | 1.913(9) |
| Cu(2)-Cl(1)       | 2.151(6)  | Cu(3)-O(13)     | 2.303(7) |
| N(5)-Cu(1)-N(4)#1 | 173.9(5)  | N(1)-Cu(3)-N(8) | 163.5(4) |

|                     |            |                     |           |
|---------------------|------------|---------------------|-----------|
| N(6)-Cu(2)-Cl(1)    | 158.1(4)   | N(1)-Cu(3)-O(13)    | 96.0(3)   |
| N(6)-Cu(2)-Cl(1)#2  | 100.3(3)   | N(8)-Cu(3)-O(13)    | 100.5(3)  |
| Cl(1)-Cu(2)-Cl(1)#2 | 101.50(19) | Cu(2)-Cl(1)-Cu(2)#2 | 78.50(19) |

Symmetry codes: #1 -x, -y+2, -z+3; #2 -x-1, -y+3, -z+2.

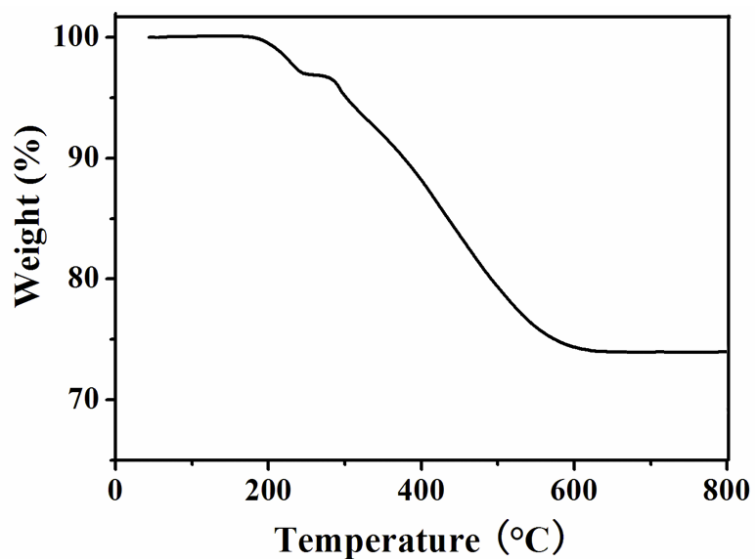

Fig. S4. The TG curve for compound 1.

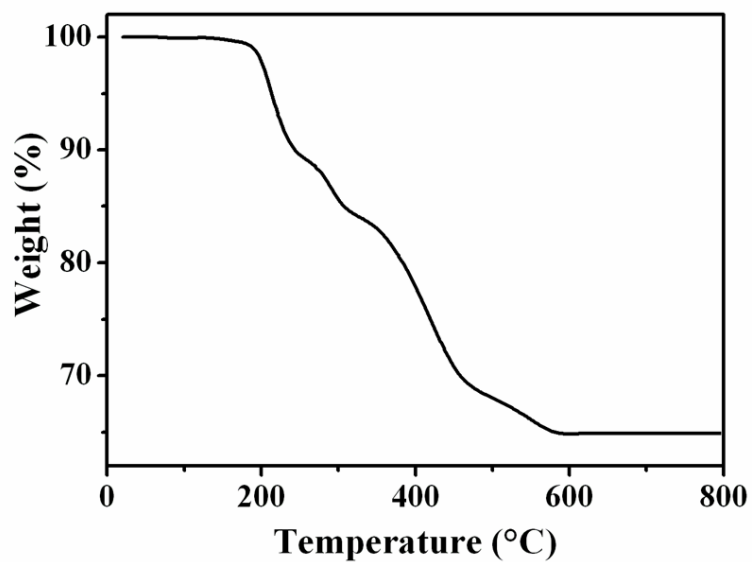

Fig. S5. The TG curve for compound 2.

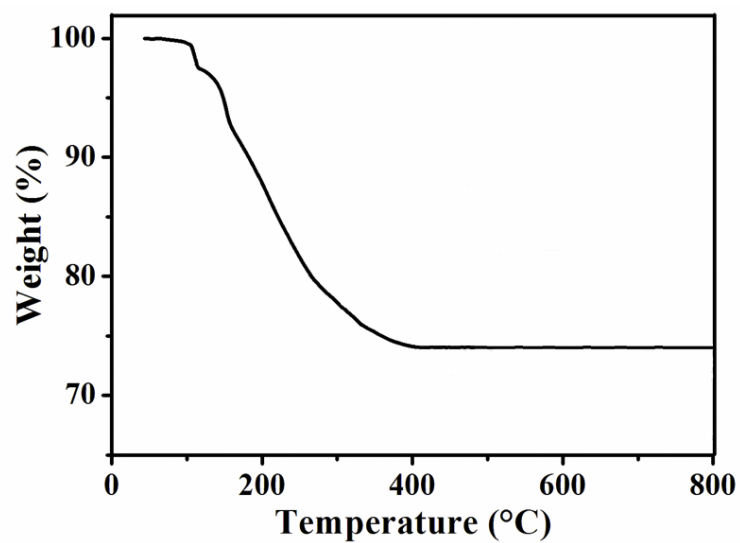

**Fig. S6.** The TG curve for compound 3.

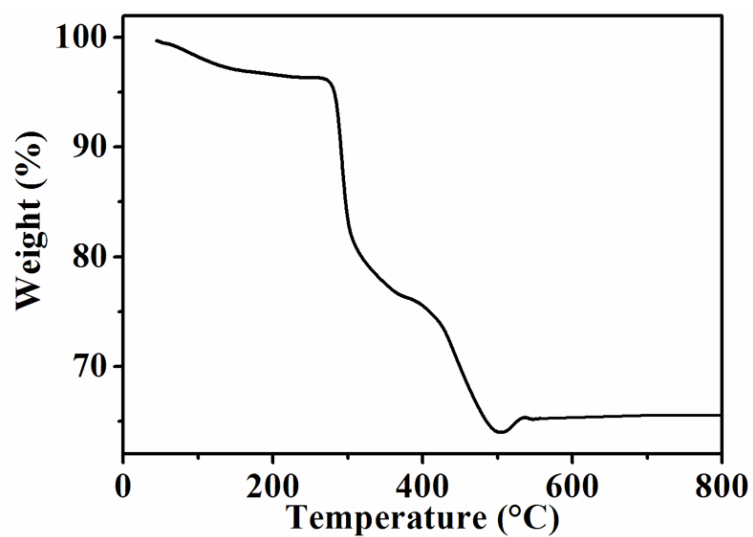

**Fig. S7.** The TG curve for compound 4.

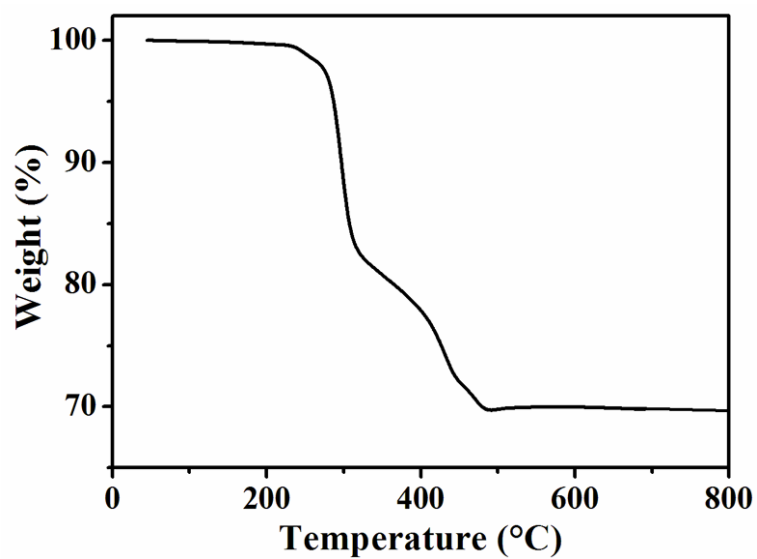

**Figure S8.** The TG curve for compound **5**.

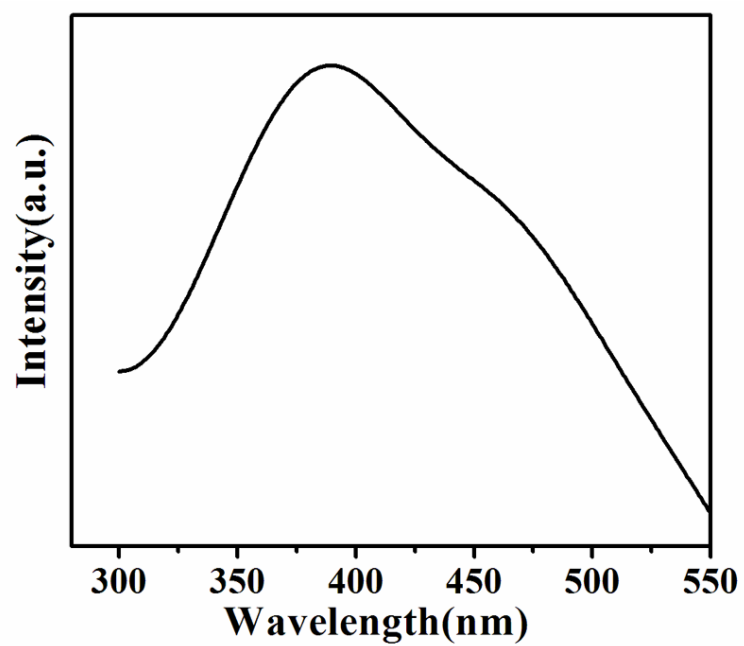

**Fig. S9.** Fluorescent emission spectrum of **5** in the solid state at room temperature ( $\lambda_{\text{ex}} = 254 \text{ nm}$ ).

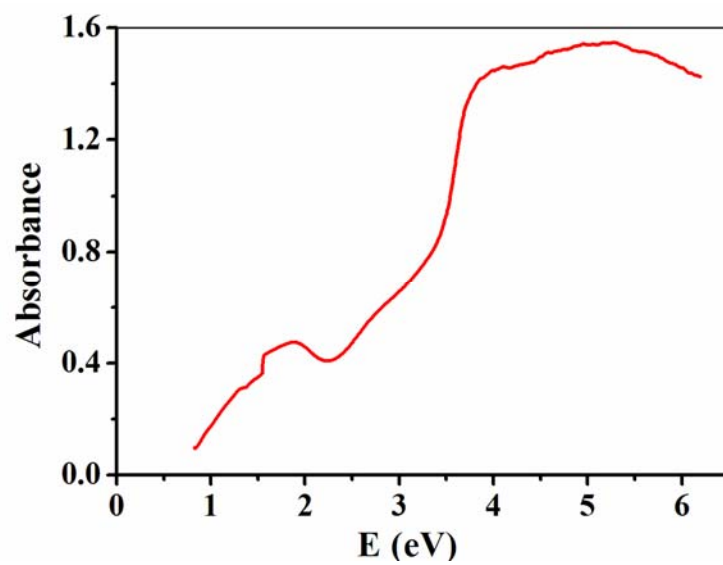

**Fig. S10.** The UV/Visible-NIR spectrum of **5**.
